# Supplementary material
Source: ML conference proceedings conference paper supplement (https://openaccess.thecvf.com/content/CVPR2022/html/Gong_PoseTriplet_Co-Evolving_3D_CVPR_2022_paper.html)
Supplement: Supplementary file 1 [file Gong_PoseTriplet_Co-Evolving_3D_CVPR_2022_supplemental.zip]

Archive with 2 entries (2 files):
- 04806-supp.mp4
- 04806-supp.pdf
